# Supplementary material for: Characterization of Botanical and Geographical Origin of Corsican “Spring” Honeys by Melissopalynological and Volatile Analysis
Source: Foods. 2014 Jan 27;3(1):128–48. doi: 10.3390/foods3010128 (PMC5302302; doi:10.3390/foods3010128)
Supplement: Supplementary File 1 [file foods-03-00128-s001.xlsx]

## Sheet: Table S1
Supplementary Information
Table S1. Pollen spectra and physico-chemical data of Corsican "spring" honeys.
Melissopalynological data			1b	2	3	4	5	6	7	8	9	10	11	12	13	14	15	16	17	18	PR	Mean	Min.	Max.	SD	CV
No.a		Taxa	RF (%)c
T18	N,P	Citrus sp.	7.79221	0.877193	0.522193	0.169779	3.1746	2.73224	3.72493	1.84502	15.1724	14.2222	12.2995	4.01786	7.18563	16.1074	3.82514	9.1954	4.21687	1.93548	100	6.05645	0.169779	16.1074	5.24714	86.6373
T5	N,P	Erica arborea	-	0.438596	0.261097	-	0.793651	1.0929	26.0745	12.5461	2.75862	7.11111	0.534759	13.3929	4.79042	4.02685	35.5191	1.72414	8.43373	0.645161	88.8889	7.50898	0.261097	35.5191	10.1664	135.39
T8	N,P	Salix sp.	-	1.31579	-	-	-	12.0219	4.58453	6.64207	1.72414	12.4444	1.06952	12.9464	0.598802	10.0671	1.63934	5.74713	7.83133	3.22581	77.7778	5.84702	0.598802	12.9464	4.54476	77.7277
T11	N,P	Prunus form	7.14286	-	0.261097	0.169779	6.34921	-	-	0.369004	0.344828	2.22222	24.0642	-	7.78443	3.3557	4.37158	2.87356	4.81928	2.58065	77.7778	4.76488	0.169779	24.0642	6.12034	128.447
T7	N,P	Lotus sp.	4.54545	1.75439	1.56658	0.679117	5.55556	8.74317	1.7192	-	-	3.11111	4.81283	0.446429	-	0.671141	-	-	0.60241	1.29032	72.2222	2.73059	0.446429	8.74317	2.50844	91.8644
T10	N,P	Rubus sp.	6.49351	1.31579	2.08877	4.41426		1.63934	1.14613	0.369004	3.7931	-	1.06952	-	-	0.671141	-	2.87356	1.80723	-	66.6667	2.30678	0.369004	6.49351	1.79731	77.914
T9	N,P	Trifolium sp.	-	52.6316	53.5248	16.4686	6.34921	9.83607	7.16332	1.10701	1.03448	-	0.534759	-	-	-	-	1.14943	0.60241	3.87097	66.6667	12.8561	0.534759	53.5248	19.3778	150.729
T6	N,P	Genista form	2.5974	-	-	-	-	-	0.573066	11.8081	0.344828	4.44444	3.20856	0.446429	2.39521	-	1.0929	1.14943	2.40964	7.09677	66.6667	3.13057	0.344828	11.8081	3.3533	107.115
T13	N,P	Echium sp.	1.2987	19.2982	29.5039	71.1375	-	2.73224	-	-	7.93103	-	-	-	-	-		19.5402	-	2.58065	44.4444	19.2528	1.2987	71.1375	23.2951	120.996
T26	N,P	Viburnum tinus	-	-	-	-	-	-	0.286533	16.2362	-	0.888889	-	-	-	-	0.546448	-	-	-	22.2222	4.48951	0.286533	16.2362	7.83499	174.518
T14	N,P	Apiaceae	-	-	-	0.169779	-	2.18579	-	0.369004	-	-	3.74332	-	-	-	-	-	-	4.51613	27.7778	2.1968	0.169779	4.51613	1.95069	88.7967
T22	N,P	Asphodelus ramosus subsp. ramosus	-	-	-	-	-	0.546448	-	-	-	-	-	-	-	-	-	-	-	1.29032	11.1111	0.918385	0.546448	1.29032	0.525999	57.2743
T16	N,P	Brassicaceae others	1.2987	-	-	-	-	2.73224	0.286533	-	-	0.444444	-	-	-	0.671141	-	-	-	1.93548	33.3333	1.22809	0.286533	2.73224	0.956941	77.9211
T17	N,P	Lavandula stoechas	-	-	-	-	-	-	-	2.58303	-	4.44444	0.534759	-	-	1.34228	0.546448	1.14943	-	1.29032	38.8889	1.69867	0.534759	4.44444	1.39039	81.8515
T19	N,P	Vicia form	-	3.07018	0.78329	0.679117	0.793651	6.01093	-	-	-	-	-	-	-	-	-	-	-	-	27.7778	2.26743	0.679117	6.01093	2.3214	102.38
T41	N,P	Lupinus angustifolius	-	3.50877	0.261097	0.679117	-	-	-	-	-	-	-	-	-	-	-	-	-	-	16.6667	1.483	0.261097	3.50877	1.76678	119.136
		Other nectariferous taxa	5.84416	2.63158	0.261097	0.509338	8.73016	6.01093	3.15186	1.47601	4.13793	2.66667	0.534759	3.57143	1.1976	0.671141	1.0929	1.72414	4.81928	10.9677	100	3.33326	0.261097	10.9677	2.99724	89.9191
T15	P	Actinidia sinensis	6.49351	1.75439	0.261097	0.509338	0.793651	4.91803	6.87679	0.738007	10	2.66667	1.06952	4.01786	8.98204	3.3557	1.0929	16.092	12.0482	1.29032	100	4.60889	0.261097	16.092	4.59651	99.7316
T2	P	Cistus sp.	7.14286	1.75439	1.04439	0.339559	10.3175	9.83607	6.59026	0.369004	2.41379	20.4444	9.09091	5.80357	10.7784	12.7517	4.37158	3.44828	6.0241	11.6129	100	6.89632	0.339559	20.4444	5.2416	76.0058
T1	P	Quercus sp.	29.8701	2.63158	2.61097	0.848896	35.7143	14.7541	13.7536	4.42804	24.4828	11.5556	28.3422	15.1786	28.1437	20.8054	25.6831	7.47126	9.63855	21.9355	100	16.5471	0.848896	35.7143	10.7407	64.9098
T3	P	Castanea sativa	3.8961	-	0.261097	-	14.2857	11.4754	6.30372	22.1402	9.31034	6.66667	1.60428	25	1.79641	6.04027	1.63934	2.87356	4.21687	9.03226	88.8889	7.90889	0.261097	25	7.25191	91.6931
T4	P	Fraxinus ornus	8.44156	1.31579	0.522193	-	2.38095	-	5.73066	1.10701	6.89655	0.888889	3.20856	1.78571	12.5749	10.0671	17.4863	1.14943	22.2892	1.29032	88.8889	6.07094	0.522193	22.2892	6.58368	108.446
T12	P	Eucalyptus sp.	1.94805	0.877193	2.08877	1.01868	0.793651	-	4.29799	-	1.37931	1.77778	1.06952	0.446429	-	4.69799	-	15.5172	-	6.45161	72.2222	3.25879	0.446429	15.5172	4.1018	125.869
T25	P	Olea sp.	0.649351	0.438596	-	-	-	-	1.14613	0.738007	0.689655	-	-	-	0.598802	-	0.546448	-	1.20482	1.29032	50	0.811348	0.438596	1.29032	0.315642	38.9034
T20	P	Pistacia lentiscus	-	-	-	-	-	-	-	-	-	-	-	-	-	-	-	0.574713	-	0.645161	11.1111	0.609937	0.574713	0.645161	0.0498147	8.16719
T24	P	Phillyrea sp.	-	-	-	-	-	-	0.286533	13.2841	-	-	-	-	-	-	-	0.574713	-	-	16.6667	4.71513	0.286533	13.2841	7.42238	157.416
		Other only-polleniferous taxa	1.2987	0.438596	0.261097	0.509338	0.793651	1.63934	1.7192	0.738007	2.75862	2.66667	0.534759	8.92857	4.79042	2.68456	0.546448	2.29885	1.20482	0.645161	100	1.91427	0.261097	8.92857	2.10598	110.015
		Indeterminate	3.24675	3.94737	3.91645	1.69779	3.1746	1.0929	4.58453	1.10701	4.82759	1.33333	2.6738	4.01786	8.38323	2.01342	-	2.87356	7.83133	2.58065	94.4444	3.48836	1.0929	8.38323	2.09087	59.9383
		Total	100	100	100	100	100	100	100	100	100	100	100	100	100	100	100	100	100	100
		Pollen density (103 PG/10 g)d	21.4	41.1	76.3	202.1	24.9	142.5	46.3	114.6	35.2	94.2	19.7	51	33	64.3	48.1	24.9	149	31		67.7556	19.7	202.1	52.4699	77.44
Physico-chemical datae
		Color	18	11	18	18	18	35	41	11	11	27	11	35	35	27	41	18	55	46		26.4444	11	55	13.6176	51.495
		Electrical conductivity	0.241	0.197	0.227	0.25	0.198	0.221	0.311	0.189	0.217	0.2	0.1515	0.255	0.272	0.212	0.284	0.206	0.419	0.385		0.246417	0.1515	0.419	0.0682974	27.7162
Table 5. continued			Group II - other "spring" honeys
Melissopalynological data			19	20	21	22	23	24	25	26	27	28	29	30	31	32	33	34	35	36	37	38	39	40	41	PR	Mean	Min.	Max.	SD	CV
No.a		Taxa	RF(%)c
T18	N,P	Citrus sp.	-	-	-	-	-	-	-	-	-	-	-	-	-	-	-	-	-	-	-	-	-	-	-	-	-	-	-	-	-
T5	N,P	Erica arborea	1.26904	1.62866	0.338983	-	-	3.58423	-	5.09554	0.233645	0.992556	5.94796	11.3402	14.6259	4.375	21.25	-	8.10811	11.8863	8.83392	5.57377	29.717	10.8614	6.14035	82.6087	7.98961	0.233645	29.717	7.58246	94.9041
T8	N,P	Salix sp.	-	5.86319	0.338983	0.322581	1.35135	1.07527	-	-	0.934579	0.248139	21.9331	4.811	29.932	-	15	-	2.7027	18.3463	2.82686	-	0.471698	0.749064	-	69.5652	6.68167	0.248139	29.932	9.31662	139.435
T11	N,P	Prunus form	-	0.651466	-	1.29032	1.35135	0.358423	1.21951	-	-	-	3.34572	-	2.04082	-	-	-	1.01351	0.775194	0.353357	0.327869	0.471698	2.24719	-	56.5217	1.18819	0.327869	3.34572	0.897662	75.5489
T7	N,P	Lotus sp.	2.03046	0.325733	4.40678	6.77419	3.24324	8.24373	2.03252	0.636943	0.700935	16.3772	-	11.3402	-	1.25	-	2.5974	7.77027	-	4.59364	52.7869	-	3.37079	1.75439	78.2609	7.23529	0.325733	52.7869	12.1225	167.547
T10	N,P	Rubus sp.	7.86802	0.651466	0.677966	10	9.45946	-	10.5691	5.73248	4.43925	5.21092	2.97398	2.74914	-	-	0.416667	11.6883	2.02703	-	0.706714	-	-	0.374532	1.31579	73.913	4.52123	0.374532	11.6883	3.99896	88.4485
T9	N,P	Trifolium sp.	19.2893	4.88599	44.0678	39.3548	37.5676	3.22581	8.13008	15.9236	22.1963	16.6253	0.743494	1.71821	-	-	0.416667	33.7662	8.10811	-	1.06007	-	-	0.749064	-	73.913	15.1664	0.416667	44.0678	15.2031	100.242
T6	N,P	Genista form	1.52284	2.28013	1.01695	3.87097	5.67568	31.5412	1.21951	-	2.80374	0.744417	3.71747	4.811	28.5714	28.75	5.41667	0.649351	5.06757	10.0775	2.4735	9.83607	1.88679	4.49438	8.77193	95.6522	7.50905	0.649351	31.5412	9.41235	125.347
T13	N,P	Echium sp.	12.4365	-	3.72881	2.25806	4.05405	2.86738	30.0813	8.9172	3.50467	1.73697	6.69145	-	-	0.625	-	2.5974	-	2.06718	1.76678	0.655738	-	-	14.0351	69.5652	6.12648	0.625	30.0813	7.54635	123.176
T26	N,P	Viburnum tinus	-	0.325733	-	-	-	-	-	-	-	-	-	1.03093	3.7415	-	0.416667	-	0.337838	-	0.353357	0.327869	0.471698	0.374532	0.877193	43.4783	0.825731	0.325733	3.7415	1.05418	127.667
T14	N,P	Apiaceae	8.37563	2.60586	0.338983	0.645161	0.540541	7.52688	4.87805	0.636943	10.9813	0.992556	0.371747	1.37457	-	-	-	1.94805	-	1.03359	2.82686	7.54098	17.4528	11.236	4.82456	82.6087	4.53321	0.338983	17.4528	4.80519	106
T22	N,P	Asphodelus ramosus subsp. ramosus	0.253807	2.9316	0.338983		0.27027	0.716846	-	0.636943	0.233645	0.248139	-	0.343643	-	0.625	0.416667	0.649351	-	0.258398	1.76678	-	-	0.374532	0.877193	69.5652	0.683862	0.233645	2.9316	0.711885	104.098
T16	N,P	Brassicaceae others	1.52284	14.658	1.69492	4.19355	1.62162	5.37634	-	-	6.7757	1.73697	5.20446	-	0.680272	-	-	1.94805	-	-	1.76678	-	-	1.1236	0.438596	60.8696	3.48155	0.438596	14.658	3.76543	108.154
T17	N,P	Lavandula stoechas	0.761421	0.651466	-	-	-	-	-	-	1.63551	-	0.743494	1.71821	2.04082	0.625	0.416667	-	3.04054	0.516796	1.06007	-	0.471698	10.1124	-	56.5217	1.83031	0.416667	10.1124	2.60578	142.368
T19	N,P	Vicia form	2.03046	0.325733	1.69492	1.6129	2.16216	3.58423	11.7886	7.64331	2.57009	7.94045	0.743494	-	-	-	-	0.649351	0.337838	-	-	-	-	-	-	56.5217	3.31412	0.325733	11.7886	3.56578	107.593
T41	N,P	Lupinus angustifolius	-	-	-	-	-	-	-	-	-	18.8586	-	-	-	-	-	-	0.675676	-	-	-	-	-	-	8.69565	9.76712	0.675676	18.8586	12.8572	131.638
		Other nectariferous taxa	3.5533	6.18893	6.77966	8.3871	8.64865	2.15054	8.13008	8.9172	6.54206	5.45906	1.85874	1.03093	1.70068	10	1.25	6.49351	8.44595	2.32558	4.24028	5.57377	4.71698	4.49438	2.63158	100	5.19648	1.03093	10	2.78061	53.5095
T15	P	Actinidia sinensis	-	0.325733	-	-	-	-	-	-	-	0.744417	-	-	-	-	-	-	-	-	-	-	-	-	-	8.69565	0.535075	0.325733	0.744417	0.296054	55.3295
T2	P	Cistus sp.	14.2132	5.53746	10.5085	7.74194	14.3243	7.16846	8.94309	18.4713	13.785	8.18859	15.6134	4.811	0.340136	4.375	4.16667	9.74026	8.44595	4.90956	2.12014	5.2459	8.49057	13.8577	33.3333	100	9.75354	0.340136	33.3333	6.91159	70.8624
T1	P	Quercus sp.	19.797	28.9902	2.0339	2.25806	1.35135	1.79211	7.31707	8.28025	13.0841	6.45161	8.55019	17.8694	4.7619	7.5	20	1.2987	8.10811	23.2558	24.735	9.18033	11.7925	3.74532	10.5263	100	10.5513	1.2987	28.9902	8.14798	77.2228
T3	P	Castanea sativa	0.253807	14.658	18.3051	7.09677	5.13514	4.6595	0.813008	7.00637	7.24299	3.97022	11.8959	24.3986	1.02041	33.75	14.1667	17.5325	20.9459	10.5943	28.9753	-	-	16.1049	5.70175	91.3043	12.1061	0.253807	33.75	9.37053	77.4036
T4	P	Fraxinus ornus	0.507614	0.651466	0.338983	0.322581	0.27027	0.716846	0.406504	2.54777	0.46729	-	3.34572	0.343643	2.04082	0.625	1.25	0.649351	-	3.10078	1.76678	0.327869	1.88679	1.1236	0.438596	91.3043	1.10135	0.27027	3.34572	0.964386	87.5643
T12	P	Eucalyptus sp.	-	0.325733	-	0.322581	-	-	0.406504	-	0.46729	0.744417	-	0.687285	3.40136	-	-	1.2987	0.337838	0.258398	0.706714	-	-	1.1236	2.63158	56.5217	0.977846	0.258398	3.40136	0.970988	99.2987
T25	P	Olea sp.	3.5533	-	1.01695	0.645161	-	-	0.813008	0.636943	-	-	-	-	-	-	-	1.2987	-	-	-	-	-	-	-	26.087	1.32734	0.636943	3.5533	1.1188	84.2889
T20	P	Pistacia lentiscus	0.507614	2.28013	-	-	-	9.319	-	0.636943	0.700935	-	4.46097	1.03093	4.08163	4.375	7.5	-	2.36486	6.20155	0.706714	-	1.88679	4.49438	2.19298	69.5652	3.29628	0.507614	9.319	2.65184	80.4495
T24	P	Phillyrea sp.	-	0.651466	-	-	-	2.86738	-	-	-	-	0.371747	2.06186	-	1.875	3.33333	-	3.71622	1.29199	0.353357	-	9.90566	4.11985	0.438596	52.1739	2.5822	0.353357	9.90566	2.6721	103.481
		Other only-polleniferous taxa	-	0.325733	0.338983	0.967742	-	0.358423	0.813008	1.27389	-	0.744417	1.11524	4.46735	0.340136	-	-	0.649351	2.7027	1.55039	1.76678	0.327869	8.49057	2.24719	2.19298	78.2609	1.70404	0.325733	8.49057	2.00706	117.782
		Indeterminate	0.253807	2.28013	2.0339	1.93548	2.97297	2.86738	2.43902	7.00637	0.700935	1.98511	0.371747	2.06186	0.680272	1.25	4.58333	4.54545	5.74324	1.55039	4.24028	2.29508	1.88679	2.62172	0.877193	100	2.48619	0.253807	7.00637	1.72458	69.3661
		Total	100	100	100	100	100	100	100	100	100	100	100	100	100	100	100	100	100	100	100	100	100	100	100
		Pollen density (103 PG/10 g)d	235	36.4	219.2	253.5	602.8	60	54	63	77.5	66	146.2	60	57.4	32	64.6	59.7	101.4	69.4	39	26.2	22.2	66	46.2		106.857	22.2	602.8	126.451	118.337
Physico-chemical datae
		Color	18	27	41	41	62	18	18	18	35	18	35	18	41	18	27	41	27	71	18	55	51	18	51		33.3478	18	71	16.2526	48.7365
		Electrical conductivity	0.157	0.1731	0.234	0.218	0.338	0.162	0.214	0.198	0.288	0.167	0.248	0.18	0.196	0.183	0.233	0.452	0.223	0.381	0.1793	0.324	0.287	0.125	0.442		0.243583	0.125	0.452	0.0900356	36.9631
a Taxa number is given in Table 1
b Sample number is given in Section 2
c RF expressed as percentage of the pollen counted in the pollen spectrum
d Pollen density expressed as the absolute number of pollen grains in 10 g of honey (103 PG/10 g)
e Unity of parameters: colour (mm Pfund); electrical conductivity (mS/cm)

## Sheet: Table S2
Supplementary Information
Table S2. Chemical composition of volatile fraction of Corsican "spring" honeys.
Noa	Components*	RI (Lit)b	RIc	Percentage (%)d
				1	2	3	4	5	6	7	8	9	10	11	12	13	14	15	16	17	18	19	20	21	22	23	24	25	26	27	28	29	30	31	32	33	34	35	36	37	38	39	40	41
C1	3-Methyl-3-buten-1-ol	711	704	2.7	0.3	3.6	2.5	3.5	1.8	0.9	11.3	5.1	3	0.5	0.6	2.3	1.9	6.7	0.4	2.1	1.4	0.5	3.7	0.8	0.6	0.5	2.4	2.6	3	0.4	6	0.4	1.8	3.8	1.9	0.7	2	2.8	1	1.2	1.6	2.2	0.8	2
C2	Methyl-benzene	745	741	4.5	2.6	4.9	4.1	10.4	3.3	2.4	15.6	1.5	7.8	12.5	2.1	5.7	9.8	14.1	3	6.2	2.7	1.5	7.1	3	6.3	2.5	5.1	4.9	10.1	1.6	10.3	4.7	2.6	17.3	10.4	2.4	4.7	10.4	2.6	8.5	5.4	2.9	8.4	6.2
C3	Hexanal	777	773	0.6	0.5	2	1.3	0.8	0.7	1.2	1.6	1.1	1	1.5	0.5	1.7	1.1	0.8	0.5	1.3	1.5	2.1	6.3	0.4	1.1	0.3	2	1	0.6	1.1	2.8	0.5	4.5	0.9	1.7	0.8	-	1.9	0.1	2	0.4	0.6	3.4	1.2
C4	Octane	800	790	1.2	1.5	2.8	2.3	4.7	1.4	1	1.1	0.6	0.3	1.2	0.5	1.7	0.5	0.8	0.5	1.2	2.2	3.3	2.2	2.6	5.4	0.8	1.4	5.4	5.6	1.6	2.5	0.9	1.4	1.2	2.2	0.5	0.7	1.4	0.3	3.2	0.5	0.8	2.6	4.6
C5	3-Furaldehyde	799	800	4.2	2.2	3.5	2.9	4.8	3.1	4.4	3.7	0.7	1.3	1.1	0.9	2	2.4	3.2	0.6	5.9	3	2.9	5.9	4.5	1.9	3.2	2.5	2.4	3.3	2.8	2.8	2.8	8	8.3	3.4	3.3	2.4	18.5	2.5	3.1	3	2.8	2.6	3.1
C6	2-Methyl butanoic acid	860	858	0.2	0.1	1.5	0.9	0.3	3.3	1.2	0.4	0.3	0.2	-	2.4	0.2	0.2	0.3	0.7	0.4	0.1	0.9	1.1	0.5	0.3	0.4	2.3	3.7	2.1	3.8	0.4	2.8	1.4	2.5	1.9	2.6	0.3	2.4	-	3.3	7	7.6	20.4	4.2
C7	2-Methyl octane	868	873	0.1	tr	0.5	0.2	0.2	0.9	0.8	0.3	0.2	0.2	0.4	0.8	0.4	0.2	0.2	0.5	0.9	0.5	0.9	0.7	-	0.2	0.1	0.7	0.9	0.9	0.5	0.4	0.8	0.7	0.7	0.8	1.2	-	1.6	0.3	1.7	0.3	0.1	0.5	1.2
C8	Nonane	900	893	0.4	0.5	0.5	0.3	1.9	0.2	0.2	1.4	0.7	0.5	2.5	0.2	0.3	0.9	0.6	0.3	0.3	1	0.6	1.7	2.3	1.9	0.4	0.2	1.1	2.1	1.9	1.6	0.2	3.5	1.6	0.9	0.8	1.1	3.8	1.1	3.1	1.4	1	1.7	1.6
C9	Benzaldehyde	929	924	3.9	4	4.6	2.8	3.8	17.9	5.6	6	3	4	3.6	7.3	2.4	4.8	6.5	5.3	8	5.5	14.5	10.2	5.1	18.4	2.5	7	3.8	7.2	15.5	6	17.5	9.8	13.3	7.6	14.8	6.6	3	8.1	7.6	13.5	5.4	4.9	5.1
C10	Hexanoic acid	975	969	1	0.9	1.4	0.8	0.7	0.8	0.6	0.4	0.5	0.5	0.4	0.5	0.9	0.6	0.7	0.7	0.9	0.5	3.3	0.8	1.1	1	1.6	0.8	1.3	1.4	0.8	0.9	0.4	1.4	0.5	0.7	0.3	2.7	-	0.5	1	3.2	3.9	1.1	1.7
C11	Octanal	981	982	0.7	0.6	1.6	1.5	0.9	1.2	2.1	0.8	1.3	0.6	0.8	1.5	0.7	0.8	0.8	0.9	0.2	1.7	0.5	0.5	0.9	0.8	0.5	1.8	1.4	1.6	3.8	0.8	0.8	1	1.3	1.2	0.7	1.2	1	0.5	1.4	0.7	-	6.6	1.3
C12	2,2,4,6,6-Pentamethylheptane	995	992	1.3	0.4	1.1	0.9	2.2	0.6	1.7	2.4	0.6	1.6	0.7	0.9	1	1.6	1.3	0.5	0.5	4.4	0.2	1.3	3.7	3.5	0.6	0.3	4.5	5.2	0.3	5	tr	2.8	1.4	0.2	0.1	2.4	15.6	-	2.9	0.3	0.5	1.7	0.4
C13	p-Methylanisol	1004	995	0.8	0.4	0.3	0.4	0.5	0.1	0.6	1	0.3	0.8	-	0.9	0.8	1.5	4.9	0.3	0.5	0.2	0.2	0.7	-	0.4	0.3	0.9	0.1	0.6	0.1	1.8	0.2	1.5	6.1	0.9	0.5	-	-	0.8	0.1	3	0.3	0.3	0.4
C14	Phenylacetaldehyde	1012	1006	2.7	3.2	4.5	3	6.4	5.5	6.1	4.3	9.8	32.1	39.1	8.1	10	19.7	3.9	13.1	0.8	20.9	22.1	20.3	26.9	26.7	20.3	32.9	18.1	14.5	16.9	29	25.7	24.2	3.7	36.2	25.7	11.9	13	14.3	18.9	7.2	15.1	14.6	17.7
C15	p-Cymene	1015	1008	-	0.5	1	0.7	-	-	0.8	-	0.9	-	-	0.5	-	-	-	0.8	0.1	-	-	-	-	-	-	-	-	-	-	-	-	-	-	-	-	-	-	-	-	0.6	1.2	tr	-
C16	Acetophenone	1036	1037	0.2	0.4	0.1	0.2	-	0.3	0.3	-	0.2	0.2	0.2	0.1	0.2	0.3	-	0.2	0.2	0.4	-	-	-	-	-	-	-	-	-	-	0.3	-	0.2	-	0.5	-	-	0.2	-	-	-	-	-
C17	trans-Furanoid-linaloxide	1058	1049	1.3	1.9	4	3.9	1.3	2.1	1.5	0.8	0.9	0.8	0.8	1.2	0.9	0.8	0.9	1.2	1.8	1.8	2.8	3.5	3.2	2.8	2.9	2.5	3	2.5	2.2	2.9	1	1.3	1.1	1.7	1.2	6.3	-	0.5	2.6	0.6	0.8	1.2	1.8
C18	cis-Furanoid-linaloxide	1072	1064	1.2	1	2	2	1.2	1.2	1.4	0.7	0.8	0.7	0.7	1	0.9	0.8	1.1	0.8	1.2	1.2	1.2	1.4	1.4	1.2	1.6	1.1	1.4	1.2	1.3	1.1	0.5	0.9	0.8	0.9	0.8	1.3	-	0.9	0.8	1.2	0.7	1.1	1.2
C19	β-Phenylethanol	1085	1077	5.8	-	-	-	-	5.6	2.6	-	5.3	-	-	5.7	3.1	-	-	3.3	2.2	-	-	-	-	-	-	2.7	2.7	-	-	-	2.1	-	-	-	1.6	-	-	-	-	-	-	-	5.8
C20	Nonanal	1076	1079	2.2	2.3	1.4	0.9	1.6	1.4	0.9	7.6	1.8	2.9	3	2.1	5.2	3.6	3.4	1.2	3.9	5.1	7.2	0.4	tr	-	-	2.1	0.9	5.3	2	2.6	1.4	3.4	0.5	0.8	1.3	tr	2.9	3.5	tr	2.7	1	6.6	1.4
C21	Linalol	1086	1084	-	1.8	6.6	1.8	0.2	-	2.6	-	-	1.2	2.3	4.2	-	1.4	1.5	-	-	17.8	3.7	3.2	23.7	12.9	32.3	-	-	6.2	14.2	7.6	-	2.1	-	4.3	-	29.6	tr	0.3	6.3	-	0.5	2.2	-
C22	Hotrienol	1083	1085	-	1.9	3.4	10.5	-	-	-	-	-	-	-	-	-	-	-	0.7	-	-	-	-	-	-	-	-	9.7	-	-	-	-	-	-	-	-	-	-	-	-	-	-	-	-
C23	Isophorone	1100	1087	-	tr	tr	-	-	2.5	2.7	-	4.9	4.2	-	0.2	-	3	1.3	2.1	4.5	0.1	3.1	12.2	tr	-	0.2	2.4	-	0.2	0.1	-	8.6	tr	1.3	1.7	8.8	-	-	19.8	9.6	20.9	29.3	5.3	7.3
C24	4-Oxoisophorone	1111	1102	0.9	0.5	0.9	0.9	-	0.8	1.1	-	0.9	1.4	0.3	0.4	0.8	1.2	1.4	0.8	1.2	1.3	1.2	2.3	2	1.3	1.7	0.6	1.7	1.1	1.2	0.8	1.2	0.8	1.6	0.3	2.3	5	-	5.6	2	4.3	6.4	1.4	1.6
C25	(2S, 2'S, 5'S)-Lilac aldehyde	1124	1112	7.9	8.9	2.9	8.2	8.5	4	4.4	3.3	7.4	4.5	2.5	7.9	4.1	5.9	4.4	6.1	1.3	1.5	-	-	-	-	-	-	-	-	-	-	-	-	-	-	-	-	-	-	-	-	-	-	-
C26	Dihydrolinalool	1118	1116	tr	0.8	3	1.9	-	1.5	1.1	-	0.9	0.9	0.5	0.7	0.9	0.9	tr	1.6	1.3	1.1	-	-	-	-	-	-	-	-	-	-	-	-	-	-	-	-	-	-	-	-	-	-	-
C27	(2R, 2'S, 5'S)-Lilac aldehyde	1133	1121	14.8	16.5	5.6	12.8	14.2	7.4	8.9	5.8	13.8	8.1	4.9	14.7	6.9	10.1	10.7	11.9	11.8	2.4	-	-	-	-	-	-	-	-	-	-	-	-	-	-	-	-	-	-	-	-	-	-	-
C28	(2R, 2'R, 5'S)-Lilac aldehyde	1146	1134	7.3	8.1	2.4	5.9	6.7	3.3	4.1	2.8	6.6	3.9	2.2	6.5	3.1	4.6	3.3	5.3	5.8	1.1	-	-	-	-	-	-	-	-	-	-	-	-	-	-	-	-	-	-	-	-	-	-	-
C29	Octanoic acid	1156	1167	0.3	2.8	6	4.5	1.2	1.4	1.9	0.6	1.6	0.5	tr	0.9	1.6	1.5	2	0.3	0.8	2.5	1.1	1	2.2	1.6	1.1	2.5	1.7	1.3	1.1	1.3	0.8	3.8	0.7	1.5	0.9	1.9	4.7	1.3	1.2	1.1	0.3	0.8	2.1
C30	Decanal	1180	1174	2.8	0.9	1.1	1.1	-	2.2	1	1.3	1.3	1	tr	1.5	0.2	-	-	0.5	0.9	2.3	1.9	0.8	1.8	0.7	0.6	1	1.6	2.1	1.4	2	0.8	1.1	0.8	1.4	0.8	-	-	0.7	2	0.6	0.2	1.8	1.7
C31	p-Menth-1-en-9-al (isomer 1)	1188	1184	2.2	1.2	2	1.9	1.8	2.5	1.3	1.5	1.9	1.4	2	2.7	1.9	2.1	1.9	2.2	2.3	-	-	-	-	-	-	-	-	-	-	-	-	-	-	-	-	-	-	-	-	-	-	-	-
C32	p-Menth-1-en-9-al (isomer 2)	1190	1186	2.1	1.6	2.5	2.1	2	1.8	1.7	0.5	2.1	1	1.6	2.2	1.6	1.8	1.8	1.6	1.7	-	-	-	-	-	-	-	-	-	-	-	-	-	-	-	-	-	-	-	-	-	-	-	-
C33	p-Anisaldehyde	1218	1208	0.3	0.1	0.3	0.1	-	0.2	0.3	-	0.2	1.3	-	0.3	0.3	1.4	4.6	0.2	0.3	-	-	-	-	-	-	0.6	0.4	0.2	0.3	-	0.5	-	0.8	-	0.3	-	-	1	-	1.1	1	-	0.3
C34	2,3,5-Trimethylphenol	1242	1248	-	0.1	0.2	0.4	-	0.5	0.4	-	0.2	-	-	0.2	0.3	-	-	0.1	1.1	-	0.6	0.8	-	-	-	0.3	-	-	0.1	-	1	2	-	0.5	0.8	-	-	2	-	0.4	-	-	-
C35	4-n-Propylanisol	1254	1264	3.1	0.2	1.5	0.5	-	0.4	5.6	-	1.3	1.1	1.3	1	0.5	0.7	5.7	0.3	1.5	-	-	2.3	-	-	-	1.4	-	-	-	-	3.8	-	6.3	-	1.9	-	-	4.3	-	2.9	0.8	-	-
C36	Nonanoic acid	1263	1271	3.3	1	4.9	0.8	4.6	3	4.1	2.5	3.6	0.5	-	2.3	3.4	1.5	3.6	1	3.2	2.9	3.2	-	2.3	2	1.9	4.9	3.7	2.9	2.7	2.6	1.6	3.8	3.1	3.7	2.6	1.3	-	3.7	2.2	2.5	1.4	4	6.4
C37	3,4,5-Trimethylphenol	-	1290	0.4	0.3	0.2	0.2	-	0.4	1.4	-	0.7	-	-	0.3	0.4	0.4	-	0.5	0.5	0.1	2	4.1	-	-	-	0.7	-	-	0.3	-	-	0.3	-	0.1	3.7	-	-	9.4	-	2.9	7	-	0.3
C38	Methyl anthranilate	1308	1300	2.4	0.8	0.3	0.9	0.9	0.2	0.6	0.5	1.4	1.6	2.6	0.7	3.5	2.2	1.4	2.5	0.6	-	-	-	-	-	-	-	-	-	-	-	-	-	-	-	-	-	-	-	-	-	-	-	-
C39	cis-p-Mentha-1(7),8-dien-1-hydroperoxide	-	1348	0.3	0.4	0.4	0.5	-	0.3	0.2	-	0.2	0.7	-	0.5	0.4	0.4	-	0.3	-	-	-	-	-	-	-	-	-	-	-	-	-	-	-	-	-	-	-	-	-	-	-	-	-
C40	Decanoic acid	1353	1362	0.8	1.4	1.6	1.7	0.9	2.1	1.8	0.8	1.4	1.4	-	0.6	0.7	1	0.7	1	1.3	-	1.6	0.1	1.3	0.7	1.9	1.1	1.8	tr	1.1	1.9	2.1	6.8	1	1	1.5	0.6	3.8	1.9	-	1.1	1.9	0.7	1.3
C41	Methyl 3,5-dimethoxybenzoate	-	1494	-	-	-	-	-	-	-	-	-	-	-	-	-	-	-	-	-	0.3	-	-	-	-	-	0.8	0.7	0.3	0.3	0.6	0.5	-	-	0.3	0.3	-	-	0.2	0.4	-	0.7	0.6	0.3
C42	Methyl syringate	-	1722	-	-	-	-	-	-	-	-	-	-	-	-	-	-	-	-	-	0.2	0.1	1.4	0.1	-	-	2.5	0.1	0.5	0.1	1.2	4.1	0.7	-	1.9	0.5	-	-	0.3	0.4	0.1	0.4	0.7	0.3
C43	Tricosane	2300	2305	0.5	0.1	0.2	-	-	0.2	0.2	-	0.2	-	0.5	-	0.5	-	-	-	0.5	-	-	0.5	-	-	0.6	0.2	-	-	-	0.6	0.3	-	-	-	-	-	-	0.5	-	-	-	0.7	-
	Total identification (%)			84.4	72.7	87.3	88.3	86.2	86.1	81.7	79	86.2	93.2	89.7	85.6	71.5	91.6	94.5	73.8	79.2	87.7	83.2	96.5	89.8	91.7	78.8	87.7	80.6	82	79.5	95.5	88.3	91.6	80.8	90.1	84.2	82	86.8	88.2	85.5	90.5	96.8	96.7	82.5
	Total peak areag			2200744	5.54535e+06	3169763	3.63653e+06	1.31462e+06	4751903	6.306e+06	1422865	5737517	2725209	1.979e+06	6.29079e+06	2.67213e+06	2.36759e+06	1.79107e+06	7417796	5159204	2.83878e+06	3918672	2200744	841856	1.114e+06	2.61668e+06	3.23897e+06	2024826	2797968	3968369	1384181	2.20853e+06	1.20659e+06	1.85577e+06	4440886	4518762	1554429	325292	4.03024e+06	1937719	1.63517e+06	2252085	1356635	3313864
	Hydrocarbons			8	5.6	11	8.5	19.4	6.6	7.1	20.8	4.7	10.4	17.8	5	9.6	13	17	5.6	9.7	10.8	6.5	13.5	11.6	17.3	5	7.9	16.8	23.9	5.9	20.4	6.9	11	22.2	14.5	5	8.9	32.8	4.8	19.4	8.5	6.5	15.6	14
	Oxygenated compounds			76.4	67.1	76.3	79.8	66.8	79.5	74.6	58.2	81.5	82.8	71.9	80.6	61.9	78.6	77.5	68.2	69.5	76.9	76.6	83	78.1	74.4	73.8	79.8	63.7	58.1	76.6	75.1	81.4	80.6	58.6	75.6	79.2	81.7	54	83.4	66.1	81.9	90.3	81.1	68.5
	Phenolic compounds			24.1	12.6	17.9	13.3	22	34.4	26.7	27.4	24.8	48.9	59.3	27.2	27.2	40.8	41.1	29.6	22	30.3	40.9	46.9	35	51.8	25.6	54.9	30.7	33.4	35.1	48.9	60.4	41.1	47.7	57.9	53	23.2	26.4	43.2	35.9	37	34.8	29.5	36.4
	Furan compounds			36.7	38.6	20.4	35.7	36.7	21.1	24.7	17.1	30.2	19.3	12.2	32.2	17.9	24.6	23.6	25.9	27.8	11	6.9	10.8	9.1	5.9	7.7	6.1	6.8	7	9.4	6.8	4.3	10.2	10.2	6	5.3	10	18.5	3.9	6.5	4.8	4.3	4.9	6.1
	Linear compounds			18.1	16	36.6	32.1	23.5	22.7	20.7	32.5	21.2	15.1	12	16	21.7	16.3	21.9	11.3	19.7	27.2	27.3	21.1	19.9	19.8	11.3	23.7	31.6	34.1	22.5	31.4	13.8	37.4	20	19.9	14.8	22.8	41.9	15.4	25.2	23.4	21.5	53.4	31.1
	Terpenic compounds			37.1	44.6	35.8	52.2	35.9	24.1	28	15.4	35.5	23.2	17.5	42.1	20.7	28.8	25.6	32.5	27.3	26.9	7.7	8.1	28.3	16.9	36.8	3.6	4.4	9.9	20.8	11.6	1.5	4.3	1.9	6.9	2	45.8	0	1.7	9.7	2.4	3.2	4.5	3
	Ketones			1.1	0.9	1	1.1	0	3.6	4.1	0	6	5.8	0.5	0.7	1	4.5	2.7	3.1	5.9	1.8	4.3	14.5	2	1.3	1.9	3	11.4	1.3	1.3	0.8	10.1	0.8	3.1	2	11.6	5	0	25.6	11.6	25.2	35.7	6.7	8.9
	Aldehydes			51.7	50.1	34.4	44.5	51.5	51.2	42	39.2	51	63.1	62.3	56.2	40.1	58.3	45.3	49.4	44.2	45	51.2	44.4	39.6	49.6	27.4	49.9	29.6	34.8	46.9	46	50	52	29.6	52.3	47.7	22.1	40.3	30.7	35	29.2	26.1	40.5	31.8
	Esters			2.4	0.8	0.3	0.9	0.9	0.2	0.6	0.5	1.4	1.6	2.6	0.7	3.5	2.2	1.4	2.5	0.6	0.3	0	0	0	0	0	0.8	0.7	0.3	0.3	0.6	0.5	0	0	0.3	0.3	0	0	0.2	0.4	0	0.7	0.6	0.3
	Alcohols			8.9	7.1	20.4	27.8	3.7	9.8	9	11.3	12.2	5.1	3.3	11.7	7	4.6	8.2	7.3	7.2	20.4	6.8	11.8	24.5	13.5	32.8	6.1	5.3	9.2	15	13.6	7.3	6.2	3.8	6.8	6.8	40.2	2.8	12.7	7.5	4.9	9.7	3	8.1
	Acids			5.6	6.2	15.4	8.7	7.7	10.6	9.6	4.7	7.4	3.1	0.4	6.7	6.8	4.8	7.3	3.7	6.6	6	10.1	3	7.4	5.6	6.9	11.6	12.2	7.7	9.5	7.1	7.7	17.2	7.8	8.8	7.9	6.8	10.9	7.4	7.7	14.9	15.1	27	15.7
	Oxides			6.7	3.9	8.2	7.3	3	4.1	9.3	2.5	3.5	4.1	2.8	4.6	3.5	4.2	12.6	2.9	5	3.4	4.2	9.3	4.6	4.4	4.8	8.4	4.5	4.8	3.6	7	5.8	4.4	14.3	5.4	4.9	7.6	0	6.8	3.9	7.7	3	3.3	3.7
a Order of elution is given on apolar coloumn (Rtx-1)
b Retention indice of literature on the apolar column reported from references (Konig et al., 2001 [1]; NIST, 2008 [2])
c Retention indice on the Rtx-1 apolar column
d Compound values expressed as percentages.
g Total peak area was expressed in arbitrary units
References
[1] Konig, W.A.; Hochmuth, D.H.; Joulain, D. Terpenoids and Related Constituents of Essential oils; Library of Mass Finder 2.1, Institute of Organic Chemistry: Hamburg, Germany, 2001.
[2] National Institute of Standards and Technology (NIST). Spectral Database for Organic Compounds. In NIST Chemistry WebBook; Available online: http://webbook.nist.gov/chemistry (accessed on 01 September 2013).
© 2014 by the authors; licensee MDPI, Basel, Switzerland. This article is an open access article distributed under the terms and conditions of the Creative Commons Attribution license (http://creativecommons.org/licenses/by/3.0/).
